# Supplementary material
Source: PubMed Central journal article supplement (PMC4295937)
Supplement: NIHMS570423-supplement-Supp_TableS1-S2.pdf [file NIHMS570423-supplement-Supp_TableS1-S2.pdf]

**The *Yersinia pestis* HmsCDE regulatory system is essential for blockage of the oriental rat flea (*Xenopsylla cheopis*), a classic plague vector**

Alexander G. Bobrov, Olga Kirillina Viveka Vadyvaloo, Benjamin J. Koestler, Angela K. Hinz, Dietrich Mack, Christopher M. Waters, and Robert D. Perry

**SUPPORTING INFORMATION**

**SUPPORTING TABLES**

**Table S1. Bacterial strains and plasmids used in this study**

| Strain or plasmid                     | Description                                                                                                                                | Reference or source       |
|---------------------------------------|--------------------------------------------------------------------------------------------------------------------------------------------|---------------------------|
| <b>Strains</b>                        |                                                                                                                                            |                           |
| <i>Escherichia coli</i>               |                                                                                                                                            |                           |
| DH5 $\alpha$                          | Cloning strain                                                                                                                             | Invitrogen                |
| DH5 $\alpha$ ( $\lambda$ <i>pir</i> ) | Strain for maintenance of R6K origin suicide vectors                                                                                       | S. C. Straley             |
| <i>Yersinia pestis</i> <sup>a</sup>   |                                                                                                                                            |                           |
| KIM5 (pCD1Ap)+                        | Pgm <sup>+</sup> (Hms <sup>+</sup> ) Lcr <sup>+</sup> (pCD1Ap; <i>yadA::amp</i> ); pMT1, pPCP1; Ap <sup>r</sup>                            | (Gong et al., 2001)       |
| KIM5-2173.1 (pCD1Ap)+                 | Pgm <sup>+</sup> (Hms <sup>+</sup> ) $\Delta$ <i>hmsC2173.1</i> Lcr <sup>+</sup> (pCD1Ap; <i>yadA::amp</i> ); pMT1, pPCP1; Ap <sup>r</sup> | This study                |
| KIM6+                                 | Pgm <sup>+</sup> (Hms <sup>+</sup> ) Lcr <sup>-</sup> ; pMT1, pPCP1                                                                        | (Fetherston et al., 1992) |
| KIM6-2051+                            | Pgm <sup>+</sup> Hms <sup>-</sup> ( <i>hmsT2051::mini-kan</i> ) Lcr <sup>-</sup> ; pMT1, pPCP1; Km <sup>r</sup>                            | (Jones et al., 1999)      |
| KIM6-2090.2+                          | Pgm <sup>+</sup> $\Delta$ <i>hmsP2090.2</i> Lcr <sup>-</sup> ; pMT1, pPCP1                                                                 | (Bobrov et al., 2011)     |
| KIM6-2093+                            | Pgm <sup>+</sup> (Hms <sup>+</sup> ) $\Delta$ <i>y2360::cam2093</i> Lcr <sup>-</sup> ; pMT1, pPCP1; Cm <sup>r</sup>                        | (Bobrov et al., 2011)     |
| KIM6-2118                             | Pgm <sup>+</sup> Hms <sup>-</sup> ( $\Delta$ <i>hmsR2118</i> ) Lcr <sup>-</sup> ; pMT1,                                                    | (Forman et al., 2006)     |

|                                    |                                                                                                                    |                           |
|------------------------------------|--------------------------------------------------------------------------------------------------------------------|---------------------------|
|                                    | pPCP1                                                                                                              |                           |
| KIM6-2159.1+                       | Pgm <sup>+</sup> <i>ΔhmsD2159.1</i> Lcr <sup>-</sup> ; pMT1, pPCP1                                                 | (Bobrov et al., 2011)     |
| KIM6-2173.1+                       | Pgm <sup>+</sup> <i>ΔhmsC2173.1</i> Lcr <sup>-</sup> ; pMT1, pPCP1                                                 | This study                |
| KIM6-2173.2                        | Pgm <sup>+</sup> Hms <sup>-</sup> ( <i>ΔhmsR2118</i> ) <i>ΔhmsN2173.1</i><br>Lcr <sup>-</sup> ; pMT1, pPCP1        | This study                |
| KIM6-2173.3+                       | Pgm <sup>+</sup> <i>ΔhmsC2173.1 ΔhmsT</i> Lcr <sup>-</sup> ; pMT1,<br>pPCP1                                        | This study                |
| KIM6-2173.4 +                      | Pgm <sup>+</sup> <i>ΔhmsC2173.1 ΔhmsT</i><br><i>ΔhmsE::kan2174</i> Lcr <sup>-</sup> ; pMT1, pPCP1; Km <sup>r</sup> | This study                |
| KIM6-2174+                         | Pgm <sup>+</sup> <i>ΔhmsE::kan2174</i> Lcr <sup>-</sup> ; pMT1,<br>pPCP1; Km <sup>r</sup>                          | This study                |
| KIM6-2174.1+                       | Pgm <sup>+</sup> <i>ΔhmsE 2174.1</i> Lcr <sup>-</sup> ; pMT1, pPCP1                                                | This study                |
| KIM6-2198+                         | Pgm <sup>+</sup> <i>ΔhmsCD2198</i> Lcr <sup>-</sup> ; pMT1, pPCP1                                                  | This study                |
| KIM10+                             | Pgm <sup>+</sup> (Hms <sup>+</sup> ) Lcr <sup>-</sup> ; pMT1                                                       | (Perry et al., 1990)      |
| CO92 <sup>c</sup>                  | Pgm <sup>+</sup> Lcr <sup>-</sup> ; pMT, pPCP                                                                      | S.W. Bearden, CDC         |
| CO92 <i>ΔhmsC</i>                  | Pgm <sup>+</sup> <i>ΔhmsC2173.1</i> Lcr <sup>-</sup> ; pMT, pPCP                                                   | This study                |
| Kimberley                          | Pgm <sup>+</sup> (Hms <sup>+</sup> ) Lcr <sup>-</sup> ; pMT, pPCP                                                  | (Fetherston et al., 1992) |
| Kuma                               | Pgm <sup>+</sup> (Hms <sup>+</sup> ) Lcr <sup>-</sup> ; pMT, pPCP                                                  | (Perry et al., 1990)      |
| Kuma <i>ΔhmsC</i>                  | Pgm <sup>+</sup> <i>ΔhmsC2173.1</i> Lcr <sup>-</sup> ; pMT, pPCP                                                   | This study                |
| <i>Pestoides D</i>                 | Pgm <sup>+</sup> (Hms <sup>+</sup> ) Lcr <sup>-</sup> ; pMT                                                        | S.W. Bearden, CDC         |
| <i>Pestoides D</i><br><i>ΔhmsC</i> | Pgm <sup>+</sup> <i>ΔhmsC2173.1</i> Lcr <sup>-</sup> ; pMT                                                         | This study                |
| <i>Pestoides F</i>                 | Pgm <sup>+</sup> (Hms <sup>+</sup> ) Lcr <sup>-</sup> ; pMT                                                        | S.W. Bearden, CDC         |

|                      |                                                                                                          |                                                  |
|----------------------|----------------------------------------------------------------------------------------------------------|--------------------------------------------------|
| <i>Pestoides</i> F   | Pgm <sup>+</sup> $\Delta$ <i>hmsC</i> 2173.1 Lcr <sup>-</sup> ; pMT                                      | This study                                       |
| $\Delta$ <i>hmsC</i> |                                                                                                          |                                                  |
| Salazar              | Pgm <sup>+</sup> (Hms <sup>+</sup> ) Lcr <sup>-</sup> ; pMT, pPCP                                        | (Perry et al., 1990;<br>Fetherston et al., 1992) |
| Yokohama             | Pgm <sup>+</sup> (Hms <sup>+</sup> ) Lcr <sup>-</sup> ; pMT, pPCP                                        | (Perry et al., 1990;<br>Fetherston et al., 1992) |
| <b>Plasmids</b>      |                                                                                                          |                                                  |
| pBAD30               | Low copy number expression vector; <i>araC</i> <sup>+</sup> ;<br><i>araBAD</i> promoter; Ap <sup>r</sup> | (Guzman et al., 1995)                            |
| pCP20                | FLP recombinase expressing plasmid; Ap <sup>r</sup><br>Cm <sup>r</sup>                                   | (Cherepanov and<br>Wackernagel, 1995)            |
| pKD3                 | Template plasmid; Cm <sup>r</sup>                                                                        | (Datsenko and Wanner,<br>2000)                   |
| pKD13                | Template plasmid; Km <sup>r</sup>                                                                        | (Datsenko and Wanner,<br>2000)                   |
| pKD46                | Red recombinase expressing plasmid; Ap <sup>r</sup>                                                      | (Datsenko and Wanner,<br>2000)                   |
| pRMCD28-T5           | <i>phoA</i> fusion vector with T5 promoter; Ap <sup>r</sup>                                              | (Bobrov et al., 2008)                            |
| pRMCD70-T5           | <i>lacZ</i> fusion vector with T5 promoter; Ap <sup>r</sup>                                              | (Bobrov et al., 2008)                            |
| pSkippy              | FLP recombinase expressing plasmid; Ap <sup>r</sup>                                                      | (Price et al., 2012)                             |
| pWL204               | Derivative of pKD46; Ap <sup>r</sup> Sac <sup>s</sup>                                                    | (Lathem et al., 2007)                            |
| pBAD- <i>hmsC</i>    | 658 bp fragment encoding <i>hmsC</i> cloned<br>into pBAD30 by SmaI/XbaI; arabinose                       | This study                                       |

|                                                   |                                                                                                                        |                       |
|---------------------------------------------------|------------------------------------------------------------------------------------------------------------------------|-----------------------|
|                                                   | inducible expression; Ap <sup>r</sup>                                                                                  |                       |
| pBAD- <i>hmsE</i>                                 | 619 bp fragment encoding <i>hmsE</i> cloned into pBAD30 by EcoRI/SmaI; arabinose inducible expression; Ap <sup>r</sup> | This study            |
| pKNG- $\Delta$ <i>hmsR</i>                        | Fragment with $\Delta$ <i>hmsR</i> cloned into pKNG101; Sm <sup>r</sup> Sac <sup>s</sup>                               | (Forman et al., 2006) |
| pKNG- $\Delta$ <i>hmsT</i> - $\Delta$ <i>scar</i> | Fragment with $\Delta$ <i>hmsT</i> - $\Delta$ <i>scar</i> cloned into pKNG101; Sm <sup>r</sup> Sac <sup>s</sup>        | (Bobrov et al., 2011) |
| pRMCD28-T5- <i>hmsC</i> -R207                     | <i>hmsC</i> -R207- <i>phoA</i> gene fusion cloned into pRMCD28-T5 by XbaI/PstI; Ap <sup>r</sup>                        | This study            |
| pRMCD70-T5- <i>hmsC</i> -R207                     | <i>hmsC</i> -207- <i>lacZ</i> gene fusion cloned into pRMCD70-T5 by XbaI/PstI; Ap <sup>r</sup>                         | This study            |
| pRMCD28-T5- <i>hmsD</i> -G425                     | <i>hmsD</i> -G425- <i>phoA</i> gene fusion cloned into pRMCD28-T5 by XbaI/PstI; Ap <sup>r</sup>                        | This study            |
| pRMCD70-T5- <i>hmsD</i> -G425                     | <i>hmsD</i> -G425- <i>lacZ</i> gene fusion cloned into pRMCD70-T5 by XbaI/PstI; Ap <sup>r</sup>                        | This study            |
| pRMCD28-T5- <i>hmsD</i> -R156                     | <i>hmsD</i> -R156- <i>phoA</i> gene fusion cloned into pRMCD28-T5 by XbaI/PstI; Ap <sup>r</sup>                        | This study            |
| pRMCD70-T5- <i>hmsD</i> -R156                     | <i>hmsD</i> -R156- <i>lacZ</i> gene fusion cloned into pRMCD70-T5 by XbaI/PstI; Ap <sup>r</sup>                        | This study            |

<sup>a</sup> All *Y. pestis* strains lacking the pCD plasmid (Lcr<sup>-</sup>) are avirulent. KIM5 strains were constructed by electroporation of pCD1Ap into KIM derivatives. KIM

derivatives with plus sign in possess an intact 102-kb chromosomal *pgm* locus which contains, among others, the *hmsHF*RS operon that is essential for biofilm formation. All KIM derivatives lacking a plus sign have either a *pgm* deletion or a mutation within the *pgm* locus.

- <sup>b</sup> Abbreviations: Ap<sup>r</sup>, Cm<sup>r</sup>, Km<sup>r</sup>, and Sm<sup>r</sup>, respectively indicate resistance to ampicillin, chloramphenicol, kanamycin, and streptomycin.
- <sup>c</sup> CO-99-3015 is the CDC stock of CO92. For simplicity, CO92 is used in the text.

**Table S2. Primers used in this study.**

| <i>Primer name</i>         | <i>Primer sequence (5'→3')</i>                                             |
|----------------------------|----------------------------------------------------------------------------|
| <i>Gene deletion</i>       |                                                                            |
| Y3729 RED-1                | CAACCACCACATTTAGCATCCCTTTTTAGCCCAACAGG<br>AAGCGTAAAAGTGTAGGCTGGAGCTGCTTCG  |
| Y3729 RED-2                | TTCGGCTTCATCGTGCATTAGCCTTCTTACGGGCAAGT<br>TGCAATACACATTCCGGGGATCCGTGCGACC  |
| Y3729 RED-2-pKD3           | TCGGCTTCATCGTGCATTAGCCTTCTTACGGGCAAGTT<br>GCAATACACTACATATGAATATCCTCCTTAGT |
| Y3731 RED-1                | TGCCTATCAGCCGAATACGACTAACACAGAAAGTTT<br>GATAGGTGACGTGTAGGCTGGAGCTGCTTCG    |
| Y3731 RED-2                | ACAGCCGCAAACCGGTAAATAAAGGACGTTAGGACGC<br>GGTGATAATAAATTCCGGGGATCCGTGCGACC  |
| Y3730 RED-2                | TTTGCATTTTCTGCATGTCACCTATCCTAAACTTTCTGT<br>CATATGAATATCCTCCTTA             |
| <i>Control of deletion</i> |                                                                            |
| Y3729-1                    | TAGCCCAACAGGAAGCGTAA                                                       |
| Y3729-Xba-2                | GATTCTAGATCGGCTTCATCGTGCATTAG                                              |
| Y3730delProbeR             | CACATCACTGTCTGAATAGCACT                                                    |
| Cm-Alex1                   | AATATCCAGCTGAACGGTCTG                                                      |

|                     |                                        |
|---------------------|----------------------------------------|
| HmsT-AO-1           | GTGGTACAACATGCTGACGG                   |
| HmsT-AO-2           | CACCAGAAAGGGGAAATGGG                   |
| HmsRO-XbaI          | GCTCTAGACTCATGATTTACCCTCCCAAT          |
| HmsRO-EcoRI         | GGAATTCTACTGGCGAACCACCGCTAAAAG         |
| pQE3730R            | CTAAGATCTTCCTAAACTTTCTGTGTTAGTCG       |
| Km2                 | CAATAGCAGCCAGTCCCTTC                   |
| pQE3730F            | CACCCATGGTATCACGGCGGATGTTGC            |
| Km1                 | ACTGGGCTATCTGGACAAGG                   |
| <i>Gene cloning</i> |                                        |
| Y3729-1             | TAGCCCAACAGGAAGCGTAA                   |
| Y3729-XbaI-2        | GATTCTAGATCGGCTTCATCGTGCATTAG          |
| Y3731pBAD-EcoRI     | GCCGAATTCGACTAACACAGAAAG               |
| Y3731-down          | GGCTCTGGGTCTATATCTGAG                  |
| Y3729-SD-fus-XbaI   | ATCTCTAGATAGCCCAACAGGAAGCG             |
| Y3729-R207-PstI     | TTACTGCAGATCGTGCATTAGCCTTCTTACG        |
| Y3730-SD-fus-XbaI   | CAATCTAGACGTAAGAAGGCTAATGCACG          |
| Y3730-G425-PstI     | ATGCTGCAGATCCTAAACTTTCTGTGTTAGTCGTATTC |
| Y3730-R156-PstI     | GTACTGCAGAACGCAATAAGCTGCCG             |
| <i>Sequencing</i>   |                                        |
| hmsA_region_F       | AGTGGCTCGCTTAGGTGG                     |
| hmsA_region_R       | GCTTCGCCCTCAATCTCG                     |
| hmsA_region_Seq_F   | CAACGAGCGGATGAAGCG                     |
| hmsA_region_Seq_R   | GAGCCACGTTGAGTCTGC                     |

## References

- Bobrov, A.G., Kirillina, O., Forman, S., Mack, D., and Perry, R.D. (2008) Insights into *Yersinia pestis* biofilm development: topology and co-interaction of Hms inner membrane proteins involved in exopolysaccharide production. *Environ Microbiol* **10**: 1419-1432.

- Bobrov, A.G., Kirillina, O., Ryjenkov, D.A., Waters, C.M., Price, P.A., Fetherston, J.D. et al. (2011) Systematic analysis of cyclic di-GMP signalling enzymes and their role in biofilm formation and virulence in *Yersinia pestis*. *Mol Microbiol* **79**: 533-551.
- Cherepanov, P.P., and Wackernagel, W. (1995) Gene disruption in *Escherichia coli*: TcR and KmR cassettes with the option of Flp-catalyzed excision of the antibiotic-resistance determinant. *Gene* **158**: 9-14.
- Datsenko, K.A., and Wanner, B.L. (2000) One-step inactivation of chromosomal genes in *Escherichia coli* K-12 using PCR products. *Proceedings of the National Academy of Sciences of the United States of America* **97**: 6640-6645.
- Fetherston, J.D., Schuetze, P., and Perry, R.D. (1992) Loss of the pigmentation phenotype in *Yersinia pestis* is due to the spontaneous deletion of 102 kb of chromosomal DNA which is flanked by a repetitive element. *Mol Microbiol* **6**: 2693-2704.
- Forman, S., Bobrov, A.G., Kirillina, O., Craig, S.K., Abney, J., Fetherston, J.D., and Perry, R.D. (2006) Identification of critical amino acid residues in the plague biofilm Hms proteins. *Microbiology* **152**: 3399-3410.
- Gong, S., Bearden, S.W., Geoffroy, V.A., Fetherston, J.D., and Perry, R.D. (2001) Characterization of the *Yersinia pestis* Yfu ABC iron transport system. *Infection and Immunity* **67**: 2829-2837.
- Guzman, L.M., Belin, D., Carson, M.J., and Beckwith, J. (1995) Tight regulation, modulation, and high-level expression by vectors containing the arabinose P<sub>BAD</sub> promoter. *J Bacteriol* **177**: 4121-4130.



- Jones, H.A., Lillard, J.W., Jr., and Perry, R.D. (1999) HmsT, a protein essential for expression of the haemin storage (Hms<sup>+</sup>) phenotype of *Yersinia pestis*. *Microbiology* **145**: 2117-2128.
- Lathem, W.W., Price, P.A., Miller, V.L., and Goldman, W.E. (2007) A plasminogen-activating protease specifically controls the development of primary pneumonic plague. *Science* **315**: 509-513.
- Perry, R.D., Pendrak, M.L., and Schuetze, P. (1990) Identification and cloning of a hemin storage locus involved in the pigmentation phenotype of *Yersinia pestis*. *J Bacteriol* **172**: 5929-5937.
- Price, P.A., Jin, J., and Goldman, W.E. (2012) Pulmonary infection by *Yersinia pestis* rapidly establishes a permissive environment for microbial proliferation. *Proc Natl Acad Sci U S A* **109**: 3083-3088.
